# Supplementary material for: Discovery of fossil asteroidal ice in primitive meteorite Acfer 094
Source: PubMed Central journal article supplement — Sci Adv. 2019 Nov 20;5(11):eaax5078. doi: 10.1126/sciadv.aax5078 (PMC6867873; doi:10.1126/sciadv.aax5078), 2019-11-20
Supplement: aax5078_SM.pdf [file aax5078_SM.pdf]

## Supplementary Materials for

### Discovery of fossil asteroidal ice in primitive meteorite Acfer 094

Megumi Matsumoto\*, Akira Tsuchiyama, Aiko Nakato, Junya Matsuno, Akira Miyake, Akimasa Kataoka, Motoo Ito, Naotaka Tomioka, Yu Kodama, Kentaro Uesugi, Akihisa Takeuchi, Tsukasa Nakano, Epifanio Vaccaro

\*Corresponding author. Email: m\_matsumto@tohoku.ac.jp

Published 20 November 2019, *Sci. Adv.* **5**, eaax5078 (2019)  
DOI: 10.1126/sciadv.aax5078

#### This PDF file includes:

- Fig. S1. Schematic illustration of the analytical protocol in this study.
- Fig. S2. SEM images of the two Acfer 094 polished sections, #1 and #2.
- Fig. S3. Histogram showing the size distribution of UPLs.
- Fig. S4. BF-TEM image of a UPL.
- Fig. S5. SAED patterns of amorphous silicates in UPLs and in the matrix.
- Fig. S6. STEM-EDS maps of equilibrated aggregate-like objects in a UPL.
- Fig. S7. BF-TEM image and SAED pattern of an enstatite whisker in the matrix.
- Table S1. Compositions of GEMS-like materials in UPLs and in the matrix.
- Table S2. Brief summary of textural and mineralogical characteristics of UPL, CP-IDP, and UPL-like lithology in the Paris meteorite.
- Table S3. Oxygen isotopic compositions of UPL and matrix.

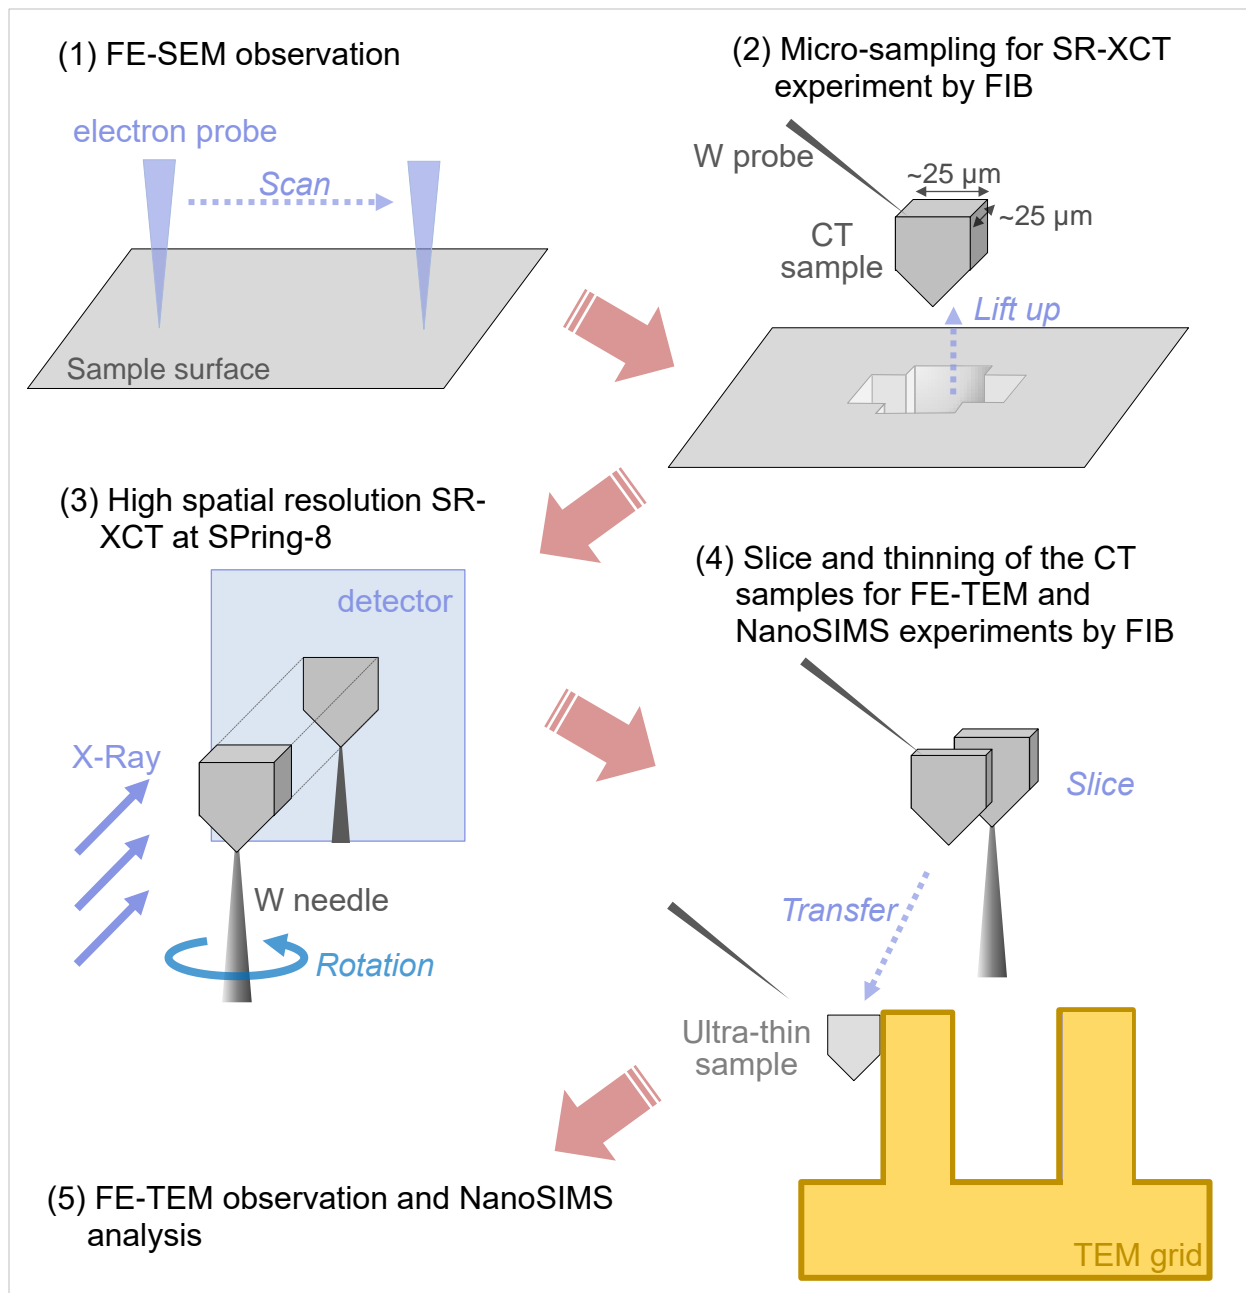

**Fig. S1. Schematic illustration of the analytical protocol in this study.**

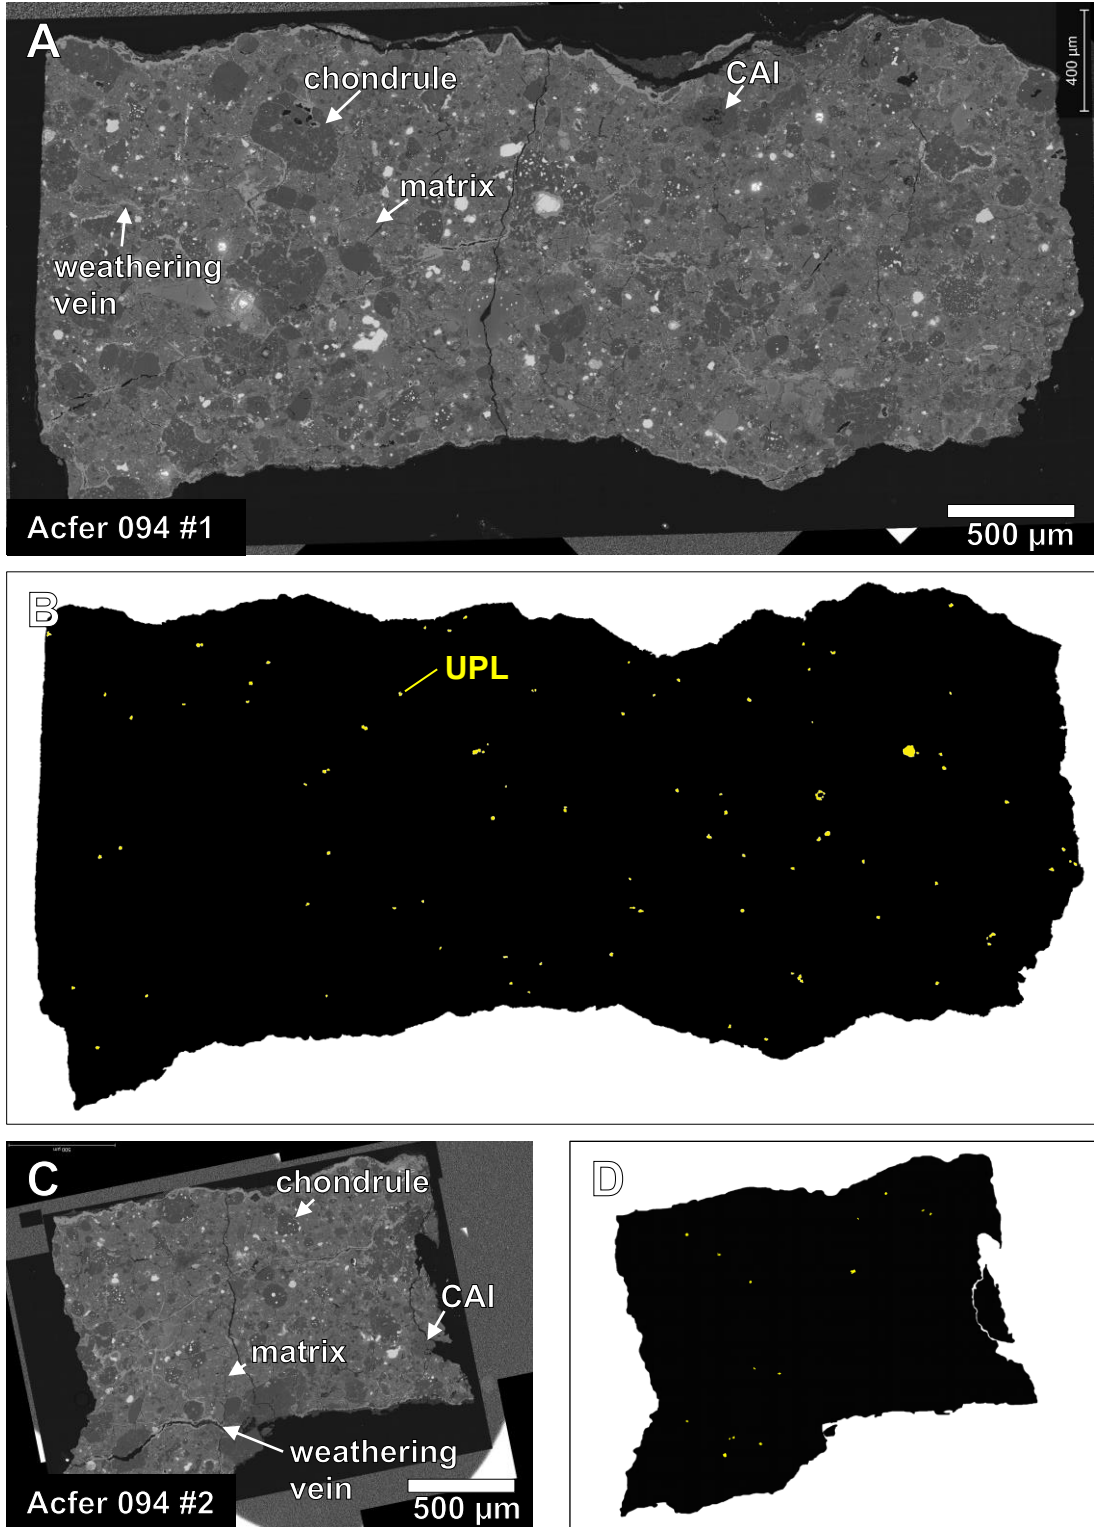

**Fig. S2.** SEM images of the two Acfer 094 polished sections, #1 and #2. BSE images of sections #1 and #2 (A and C) and their illustrations (B and D) show that UPLs (colored in yellow) are widely distributed in the polished sections.

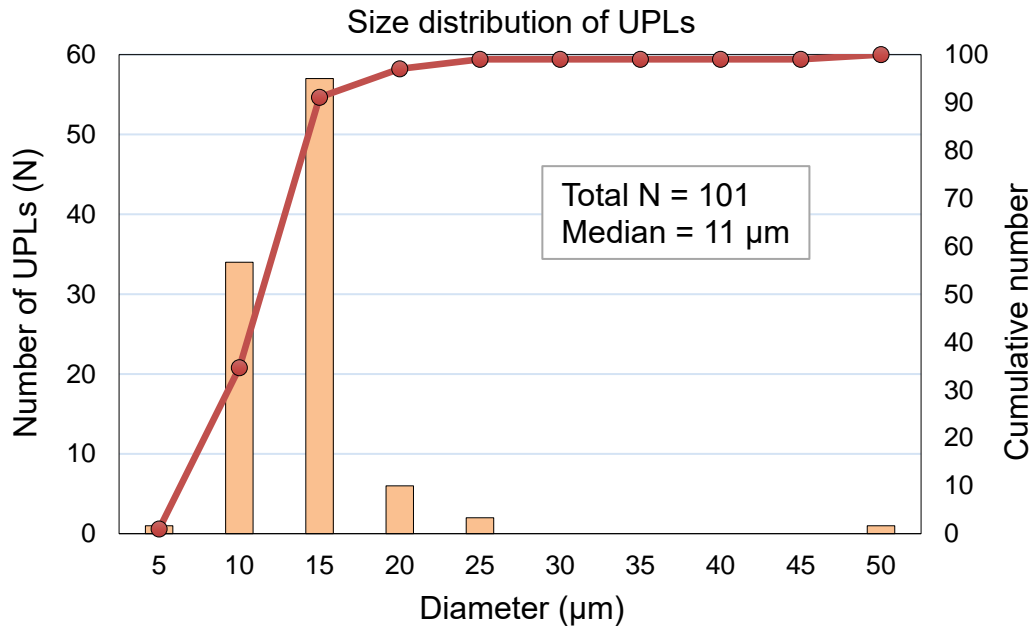

**Fig. S3. Histogram showing the size distribution of UPLs.** Most of them are <25 μm in diameter (sphere-equivalent diameter obtained from the cross-sectional area of individual UPL), with a median diameter of 11 μm. The cumulative count distribution is also shown.

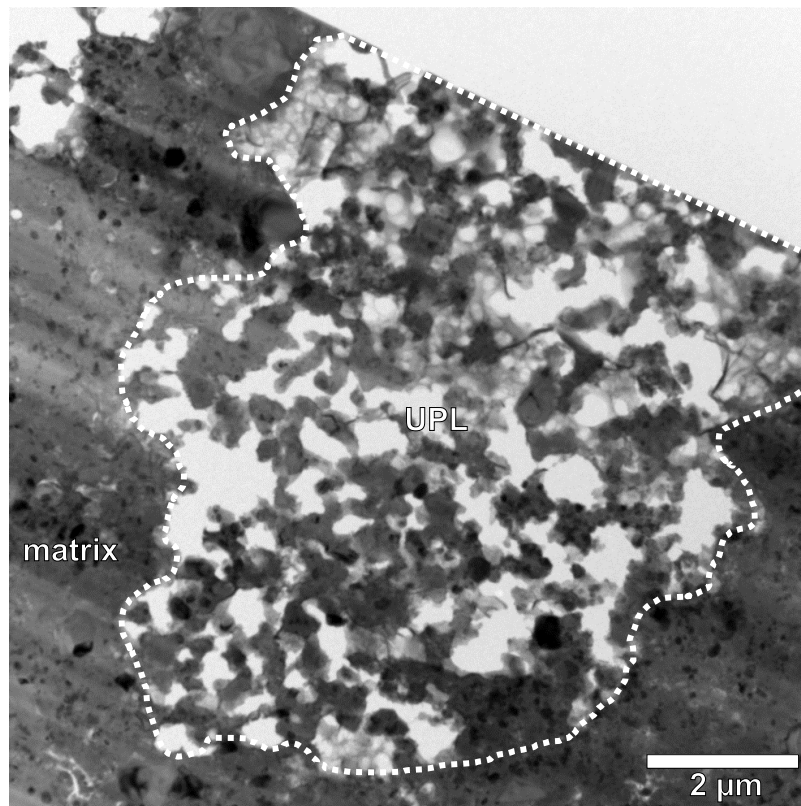

**Fig. S4. BF-TEM image of a UPL.** The bright regions correspond to pores. The UPL shows a highly porous texture compared to the surrounding matrix.

Two-dimensional SAED patterns of amorphous silicates

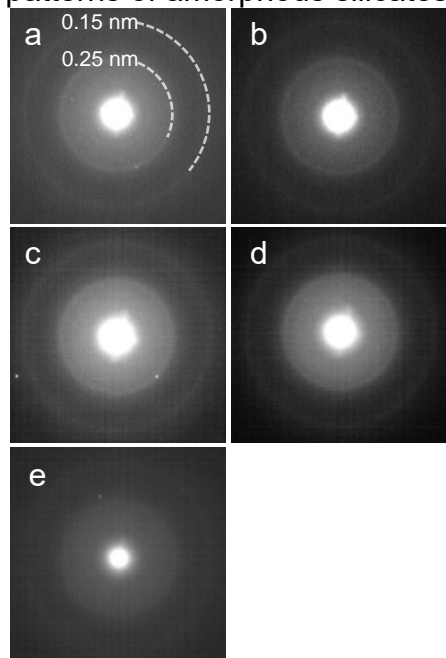

One-dimensional SAED patterns of amorphous silicates

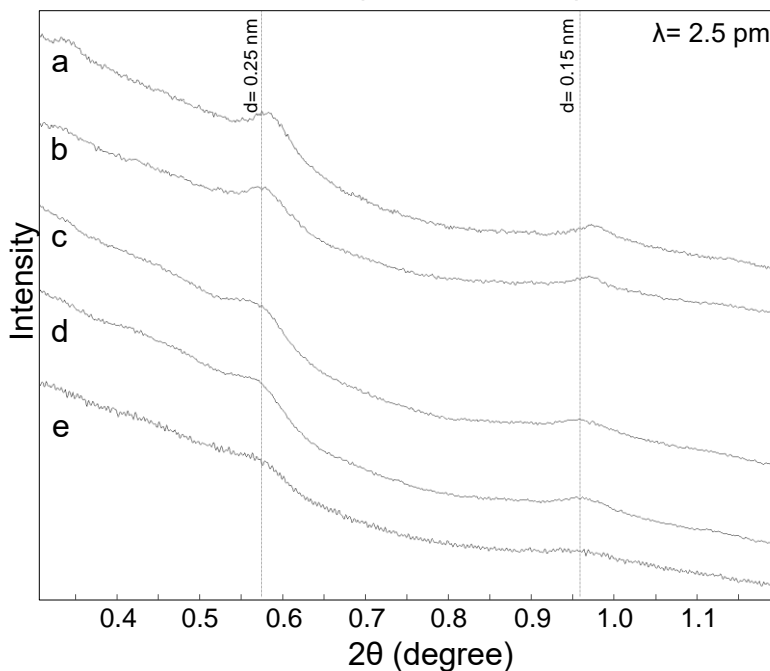

**Fig. S5. SAED patterns of amorphous silicates in UPLs and in the matrix.** The left panel shows the 2D SAED patterns of the five representative amorphous silicates (a–e). The right panel shows the 1D-converted SAED patterns of the same amorphous silicates (a–e). The SAED patterns of (a–d) contain weak rings with  $d$ -spacings of  $\sim 0.25$  and  $\sim 0.15$  nm, suggesting poorly crystallized states. The SAED pattern of (e) does not contain any such ring corresponding to amorphous materials.

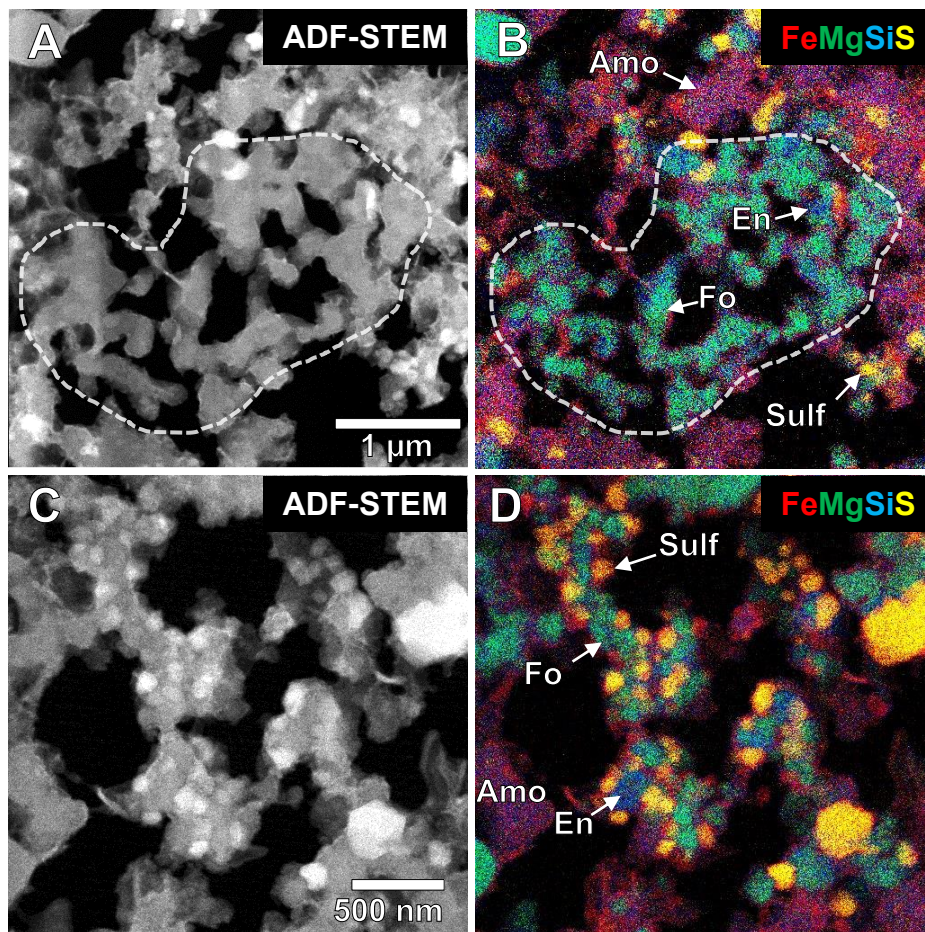

**Fig. S6. STEM-EDS maps of equilibrated aggregate-like objects in UPL.** An annular dark field (ADF) STEM image (A) and a combined STEM-EDS map (Fe in red, Mg in green, Si in blue, and S in yellow) (B) of an aggregate of forsterite (Fo; light green) and enstatite (En; cyan) show similarities to Type II EA in CP-IDPs (2). Also shown are an ADF-STEM image (C) and a combined STEM-EDS map (again Fe in red, Mg in green, Si in blue, and S in yellow) (D) of an aggregate of forsterite, enstatite, and Fe–Ni sulfides (Sulf; yellow), showing similarities to Type I EA in CP-IDPs (2). Amo: amorphous silicate.

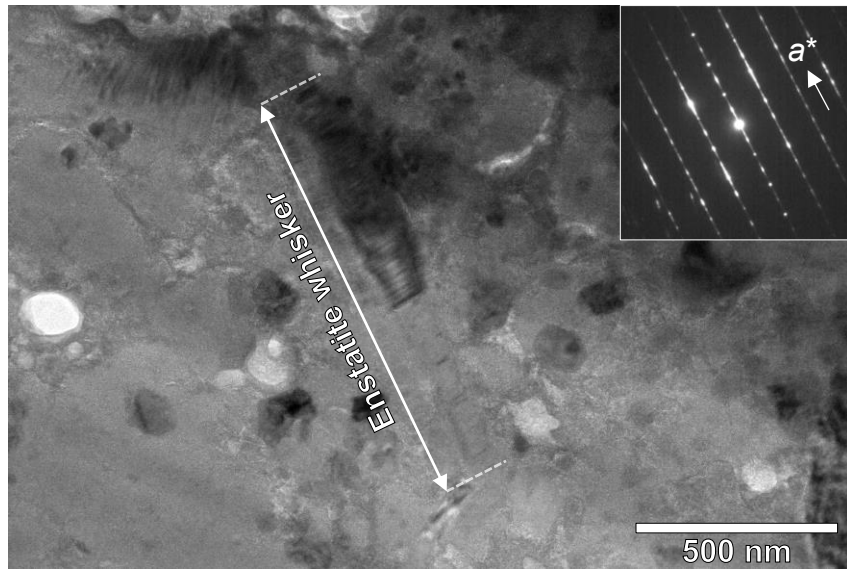

**Fig. S7. BF-TEM image and SAED pattern of an enstatite whisker in the matrix.** The enstatite whisker is elongated along the crystallographic  $a$ -axis.



**Table S1. Compositions of GEMS-like materials in UPLs and in the matrix.**

|                               | UPL     |            | UPL     |            | UPL       |            | matrix  |            | matrix   |            | matrix    |            |
|-------------------------------|---------|------------|---------|------------|-----------|------------|---------|------------|----------|------------|-----------|------------|
|                               | wt.%    | 2 $\sigma$ | wt.%    | 2 $\sigma$ | wt.%      | 2 $\sigma$ | wt.%    | 2 $\sigma$ | wt.%     | 2 $\sigma$ | wt.%      | 2 $\sigma$ |
| O                             | 40.82   | 1.46       | 37.11   | 1.19       | 47.58     | 2.11       | 44.19   | 1.38       | 45.45    | 1.39       | 47.24     | 1.34       |
| Mg                            | 5.59    | 0.56       | 4.92    | 0.40       | 4.37      | 0.78       | 11.60   | 0.75       | 8.66     | 0.65       | 4.36      | 0.43       |
| Al                            | 1.86    | 0.30       | n.d.    | n.d.       | n.d.      | n.d.       | 1.13    | 0.21       | 1.20     | 0.22       | 3.24      | 0.34       |
| Si                            | 16.77   | 0.91       | 11.60   | 0.58       | 13.69     | 1.28       | 16.82   | 0.86       | 16.75    | 0.86       | 16.09     | 0.80       |
| S                             | n.d.    | n.d.       | 6.05    | 0.39       | n.d.      | n.d.       | n.d.    | n.d.       | n.d.     | n.d.       | 0.91      | 0.18       |
| Ca                            | 2.17    | 0.32       | 1.19    | 0.17       | n.d.      | n.d.       | 1.69    | 0.27       | 1.56     | 0.26       | 2.57      | 0.31       |
| Fe                            | 32.79   | 1.32       | 36.87   | 1.07       | 34.36     | 2.03       | 24.58   | 1.12       | 26.39    | 1.16       | 25.59     | 1.10       |
| Ni                            | n.d.    | n.d.       | 2.25    | 0.29       | n.d.      | n.d.       | n.d.    | n.d.       | n.d.     | n.d.       | n.d.      | n.d.       |
| H <sub>2</sub> O <sup>*</sup> | 3.0–3.4 |            | 9.2–9.6 |            | 17.6–18.0 |            | 6.9–7.1 |            | 9.7–10.0 |            | 14.1–14.4 |            |

\*Values calculated under the assumption that S and Ni are derived from sulfides and using the value of  $\text{Fe}^{3+}/\Sigma\text{Fe} = 0.66\text{--}0.73$  (34) for iron oxidation state.

**Table S2. Brief summary of textural and mineralogical characteristics of UPL, CP-IDP, and UPL-like lithology in the Paris meteorite.**

|                                              | UPL in Acfer 094                                                                                                            | UPL-like lithology in Paris* <sup>1</sup>                                                                                          | CP-IDP* <sup>2</sup>                                                                                 |
|----------------------------------------------|-----------------------------------------------------------------------------------------------------------------------------|------------------------------------------------------------------------------------------------------------------------------------|------------------------------------------------------------------------------------------------------|
| <i>Texture</i>                               | highly porous                                                                                                               | porous                                                                                                                             | highly porous                                                                                        |
| <i>(porosity in %)</i>                       | (~40%)                                                                                                                      | (no data)                                                                                                                          | (>50%)                                                                                               |
| <i>Mineralogy</i>                            | amorphous silicate, forsterite, enstatite (including whisker), Fe–Ni sulfides, organics, poorly crystallized phyllosilicate | amorphous silicate, forsterite* <sup>3</sup> , enstatite* <sup>3</sup> , Fe–Ni sulfides, Fe oxide, organics, fine fibrous material | amorphous silicate, forsterite, enstatite (including whisker), Fe–Ni metal, Fe–Ni sulfides, organics |
| <i>Characteristics of amorphous silicate</i> | GEMS-like texture without Fe–Ni metal, hydrated                                                                             | GEMS-like texture without Fe–Ni metal, hydrated* <sup>4</sup>                                                                      | GEMS, dry                                                                                            |

\*<sup>1</sup>Data from (8). \*<sup>2</sup>Data from (1–4). \*<sup>3</sup>Presence of Mg-rich silicate whisker was presented in (8).

\*<sup>4</sup>Exact water contents were not presented in (8).

**Table S3. Oxygen isotopic compositions of UPL and matrix.**

|                               | $\delta^{17}\text{O}$ | $\delta^{18}\text{O}$ |
|-------------------------------|-----------------------|-----------------------|
| GEMS-like materials#1         | $-9.3 \pm 25.0$       | $16.1 \pm 9.4$        |
| GEMS-like materials#2         | $-6.64 \pm 4.52$      | $15.24 \pm 2.03$      |
| Organics#1                    | $8.18 \pm 23.80$      | $31.49 \pm 9.69$      |
| Organics#2                    | $25.4 \pm 12.7$       | $30.4 \pm 8.7$        |
| UPL/matrix mean               | $4.0 \pm 9.0$         | $29.8 \pm 4.8$        |
| GEMS in CP-IDP mean (2)       | $-16.1 \pm 12.5$      | $-2.3 \pm 4.00$       |
| Acfer 094 bulk meteorite (15) | $-3.91$               | $1.17$                |

\*Errors are  $1\sigma$ .  $^{17}\text{O}/^{16}\text{O}_{\text{smow}} = 0.0003829$ ,  $^{18}\text{O}/^{16}\text{O}_{\text{smow}} = 0.0020052$ .
